# Supplementary material for: Signaling Toward Reactive Oxygen Species-Scavenging Enzymes in Plants
Source: Front Plant Sci. 2021 Feb 1;11:618835. doi: 10.3389/fpls.2020.618835 (PMC7882706; doi:10.3389/fpls.2020.618835)
Supplement: Supplementary file 1 [file Table_1.xlsx]

## Sheet: Table S1. FSD1
Table S1. Prediction of transcription factors controlling the expression of FSD1 under the control of MPK3, MPK4 or MPK6. Final list of transcription factors was obtained by the following workflow: First, TFs secific for cis elements present in promoter sequence of the target antioxidant gene were found using AthaMap (Gene Analysis; Upstream region: -1000, Downstream region: 50, % Restriction to …
		GPS 3.0 (CMGC/MAPK)						ELM					PhosPhAt 4.0				ATTED-II
AGI	Name	Position	Code	Peptide	Score	Cutoff		Elm Name	Position	Instances (Matched Sequence)	Probability		Peptide	Score	Source		Target	New rank	Average rank to query genes
AT1G02065	SPL8	281	S	TGKTTPKSPNDSGVK	51.742	14.896		MOD_ProDKin_1	46-52	ITISPPL	0.01543		TTPKSPNDSGVK	29.45	Roitinger et al., 2015
		95	T	YGSTTTTTPYGASDP	47.233	14.896			92-98	TTTTPYG			SPNDSGVK	24.62	Roitinger et al., 2015
		49	S	DHRHITISPPLLSSF	43.656	14.896			182-188	SLSTPRC
		185	T	GMANSLSTPRCQAEG	41.656	14.896			275-281	GKTTPKS
		278	T	DTGTGKTTPKSPNDS	36.815	14.896			278-284	TPKSPND
		292	S	SGVKASSSPSSNAPP	34.959	14.896			289-295	ASSSPSS
		94	T	LYGSTTTTTPYGASD	17.943	14.896
AT1G13260	RAV1	19	T	STGSICETPAITPAK	44.688	14.896		MOD_ProDKin_1	16-22	ICETPAI	0.01543		KSSVGNLYR	33.97	Roitinger et al., 2015		FSD1+MPK3	149	2.93
		23	T	ICETPAITPAKKSSV	34.328	14.896			20-26	PAITPAK			SSVGNLYR	23.2	Roitinger et al., 2015
		310	S	RLFGVNISPESSRND	31.998	14.896			190-196	KAVTPSD			MESSSVDESTTSTGSICETPAITPAK	15	n. a.
		193	T	ALFEKAVTPSDVGKL	31.937	14.896			307-313	VNISPES
		12	S	SVDESTTSTGSICET	15.231	14.896		DOC_MAPK_gen_1	264-274	KNLRAGDVVSF	0.004324
									300-309	RVLRLFGVNI
AT1G17950	MYB52	177	T	IGFRNSTTPIQEGAI	27.281	14.896		MOD_ProDKin_1	174-180	NSTTPIQ	0.01543
AT1G28300	LEC2	128	S	NNSSPNSSPSELVDS	39.628	14.896		MOD_ProDKin_1	121-127	NNSSPNS	0.01543
		124	S	MRSRNNSSPNSSPSE	31.357	14.896			125-131	PNSSPSE
								DOC_MAPK_gen_1	136-144	KRQLMMLNL	0.004324
								DOC_MAPK_MEF2A_6	136-144	KRQLMMLNL	0.002584
									137-144	RQLMMLNL
								DOC_MAPK_RevD_3	140-154	MMLNLKNNVQISDKK	0.0001805
								DOC_MAPK_FxFP_2	49-52	FSYP	5.626e-05
AT1G42990	BZIP60	100	S	DKVLTVDSPAAADDS	41.504	14.896		MOD_ProDKin_1	35-41	LQSSPDS	0.01543
		38	S	AEDFLQSSPDSWIGE	28.507	14.896			97-103	TVDSPAA
								DOC_MAPK_gen_1	285-293	RMKYQILTL	0.004324
AT1G63480	AHL12	308	T	NNSEMETTPGSAAEP	42.086	14.896		MOD_ProDKin_1	118-124	RDSSPMS	0.01543		DSSPMSDPNEPK	133.95	Van Leene et al., 2019
		323	T	AASAGQQTPQNFSSQ	37.029	14.896			305-311	METTPGS			DSSPMSDPNEPK	48.37	Roitinger et al., 2015
		121	S	SNKSRDSSPMSDPNE	33.593	14.896			320-326	GQQTPQN			GWPGSGSGSGR	40.57	Roitinger et al., 2015
		311	S	EMETTPGSAAEPAAS	15.496	14.896							DSSPMSDPNEPKR	38.24	Roitinger et al., 2015
													KYGEPMVSNKSR	31.53	Roitinger et al., 2015
													SRDSSPMSDPNEPK	31.15	Roitinger et al., 2015
													SRDSSPMSDPNEPK	29.11	Roitinger et al., 2015
													SRDSSPMSDPNEPK	22.94	Roitinger et al., 2015
													DSSPMSDPNEPK	20.65	Roitinger et al., 2015
													SRDSSPMSDPNEPKR	19.23	Roitinger et al., 2015
													SRDSSPMSDPNEPKR	14.06	Roitinger et al., 2015
AT1G67710	ARR11	271	S	GVKNADSSPKDVEVN	33.209	14.896		MOD_ProDKin_1	4-10	SGFSPVG	0.01543
		485	S	QFQDYSSSPSLLSEL	32.71	14.896			268-274	ADSSPKD
		7	S	*MEKSGFSPVGLRVL	32.128	14.896			280-286	GYQSPGR
		398	T	EMKPPYETPAGGSSV	30.396	14.896			395-401	PYETPAG
		283	S	EVNSGYQSPGRSSYV	24.675	14.896			482-488	YSSSPSL
								DOC_MAPK_gen_1	326-334	KTKKTRIGF	0.004324
									328-334	KKTRIGF
AT2G20570	GLK1	5	S	***MLALSPATRDGC	35.597	14.896		MOD_ProDKin_1	2-8	LALSPAT	0.01543						FSD1	282	2.31
		339	T	HPMHNGTTPYLPTVA	32.287	14.896		DOC_MAPK_MEF2A_6	400-409	RPWLPLPLGL	0.002584
		315	S	PKHLPPPSTAMPNPP	18.631	14.896		DOC_MAPK_DCC_7	400-409	RPWLPLPLGL	0.0004513
		175	T	FFLKVDWTPELHRRF	15.487	14.896		DOC_MAPK_HePTP_8	397-409	VLTRPWLPLPLGL	0.0001066
AT2G28550	TOE1	128	T	DGETKLVTPVPTPAP	40.718	14.896		MOD_ProDKin_1	7-13	NADSPES	0.01543		VGSSSGGDESPAASASVTK	45	Zhang et al., 2013		FSD1	222	2.48
		78	S	SSSGGDESPAASASV	39.108	14.896			75-81	GDESPAA			MLDLNLNADSPESTQYGGDSYLDR	33	Umezawa et al., 2013
		10	S	DLNLNADSPESTQYG	37.74	14.896			125-131	KLVTPVP
		132	T	KLVTPVPTPAPVPAQ	30.853	14.896			129-135	PVPTPAP
		368	T	YMGKPVNTPLPYGSS	25.88	14.896			365-371	PVNTPLP
		13	S	LNADSPESTQYGGDS	14.921	14.896		DOC_MAPK_MEF2A_6	109-116	RNWIDLSF	0.002584
								DOC_MAPK_FxFP_2	340-343	FHFP	5.626e-05
AT2G42430	ASL18	173	S	VNPNNPVSPQSSLEE	52.211	14.896		MOD_ProDKin_1	11-17	GTGSPCG	0.01543
		14	S	GTTAGTGSPCGACKF	39.223	14.896			143-149	TSVSPIG
		146	S	TWQQTSVSPIGSAYS	33.791	14.896			151-157	AYSTPYN
		154	T	PIGSAYSTPYNHHQP	23.796	14.896			170-176	NPVSPQS
								DOC_MAPK_MEF2A_6	59-66	KLLLNVPI	0.002584
AT2G45190	YAB1	8	S	MSMSSMSSPSSAVCS	44.315	14.896		MOD_ProDKin_1	5-11	SMSSPSS	0.01543
		227	T	AAANVGVTPY*****	36.073	14.896			12-18	AVCSPDH
		15	S	SPSSAVCSPDHFSPS	34.569	14.896			17-23	DHFSPSD
		20	S	VCSPDHFSPSDHLCY	16.45	14.896
AT3G04060	NAC046	301	T	SDVNTTATPEISSYP	42.404	14.896		MOD_ProDKin_1	298-304	TTATPEI	0.01543
		176	T	FHKNAPSTTITTTKQ	20.962	14.896		DOC_MAPK_gen_1	39-47	KEKVFNIRF	0.004324
AT3G08500	MYB83	147	S	NNTSSGSSPNNSNSN	42.144	14.896		MOD_ProDKin_1	144-150	SGSSPNN	0.01543
		195	S	TMRMDSSSPFNVGPM	26.314	14.896			192-198	DSSSPFN
		89	S	DLKRGSFSPQEEDLI	26.017	14.896
		36	S	KLRKGLWSPDEDEKL	24.64	14.896
AT3G18400	NAC058	251	S	SLLGPPLSPINSLLL	54.715	14.896		MOD_ProDKin_1	170-176	SFGSPCD	0.01543
		173	S	SSQPSFGSPCDANSS	34.13	14.896			248-254	PPLSPIN
								DOC_MAPK_gen_1	25-32	RKVSDIGF	0.004324
								DOC_MAPK_MEF2A_6	35-42	KAVVDVDL	0.002584
									97-104	RSGVLVGM
AT3G51060	STY1	328	T	VATASSSTPNLGGIG	38.174	14.896		MOD_ProDKin_1	325-331	SSSTPNL	0.01543
		353	T	DPAALYPTPINTFMA	35.946	14.896			350-356	LYPTPIN
AT3G53600	Putative C2H2-zinc-finger-type	151	T	EILDLNLTPLENDLV	40.602	14.896		MOD_ProDKin_1	148-154	LNLTPLE	0.01543
								DOC_MAPK_gen_1	72-78	KKPKLIV	0.004324
								DOC_MAPK_MEF2A_6	143-150	KEILDLNL	0.002584
									163-171	KNLVPQIDL
								DOC_MAPK_DCC_7	163-171	KNLVPQIDL	0.0004513
AT4G14465	AHL20	166	S	GAFLPGPSPPGSTGL	36.681	14.896		MOD_ProDKin_1	87-93	TRDSPNA	0.01543		LPMEEEEDGGGSR	28	Zhang et al., 2013
		90	S	PIFVTRDSPNALRSH	32.417	14.896			231-237	GGDSPPR			QIHGGGDSPPR	21	Zhang et al., 2013
		234	S	QIHGGGDSPPRIGSN	27.187	14.896		DOC_MAPK_gen_1	77-86	KNKPKAPIFV	0.004324
		170	S	PGPSPPGSTGLTVYL	21.144	14.896			79-86	KPKAPIFV
								DOC_MAPK_MEF2A_6	36-43	KGDLGIAM	0.002584
AT4G31920	RR10	356	S	SFTSQQNSPMVAPSN	43.114	14.896		MOD_ProDKin_1	353-359	QQNSPMV	0.01543
		426	S	NAFCDSASPLVNPNL	33.181	14.896			380-386	PGFSPHF
		383	S	LPSNPGFSPHFEISK	27.588	14.896			423-429	DSASPLV
		401	S	HWSNAALSTNIPQSD	15.62	14.896		DOC_MAPK_FxFP_2	456-459	FFYP	5.626e-05
AT4G35390	AGF1	45	T	DEAKAETTPTGGATS	47.396	14.896		MOD_ProDKin_1	20-26	DSRTPPD	0.01543		NKPKPPTIITR	99	Engelsberger and Schulze, 2012
		219	T	LPIEEEETPPPRTTG	32.732	14.896			42-48	AETTPTG			AETTPTGGATSSATASGSSSGR	40	Zhang et al., 2013
		86	S	PTIITRDSPNVLRSH	30.003	14.896			83-89	TRDSPNV			AETTPTGGATSSATASGSSSGR	33	Zhang et al., 2013
		23	T	QRPEDSRTPPDQNNM	26.748	14.896			216-222	EEETPPP			AETTPTGGATSSATASGSSSGR	30	Zhang et al., 2013
													LPIEEEETPPPR	30	Zhang et al., 2013
													NKPKPPTIITR	26	Engelsberger and Schulze, 2012
													NKPKPPTIITR	24	Engelsberger and Schulze, 2012
AT5G03510	Putative C2H2-zinc-finger-type	30	S	TKRQRSASPLMMNAA	31.929	14.896		MOD_ProDKin_1	27-33	RSASPLM	0.01543
								DOC_MAPK_gen_1	104-112	KKPVASLGL	0.004324
									244-253	RPKNFLQLDL
								DOC_MAPK_MEF2A_6	105-114	KPVASLGLGL	0.002584
									244-253	RPKNFLQLDL
									246-255	KNFLQLDLNL
AT5G06950	TGA2	5	S	***MADTSPRTDVST	43.791	14.896		MOD_ProDKin_1	2-8	ADTSPRT	0.01543
		181	T	LLSGMWKTPAERCFL	22.7	14.896			178-184	MWKTPAE
								DOC_MAPK_gen_1	316-325	RLRALSSLWL	0.004324
AT5G12870	MYB46	138	S	LINNSSSSPNTASDS	40.61	14.896		MOD_ProDKin_1	135-141	SSSSPNT	0.01543
		77	S	DLKRGAFSPQEEDLI	32.074	14.896			196-202	DDFTPYV
		24	S	KMKKGLWSPEEDSKL	27.209	14.896		DOC_MAPK_gen_1	2-8	RKPEVAI	0.004324
		199	T	HPCNDDFTPYVDGIY	26.19	14.896
AT5G13790	AGL15	257	S	DQSSLANSPPEAKRQ	35.319	14.896		MOD_ProDKin_1	228-234	ERESPSS	0.01543
		231	S	TNEGERESPSSDSVT	31.125	14.896			254-260	LANSPPE
		234	S	GERESPSSDSVTTNT	20.141	14.896
AT5G17300	RVE1	4	S	****MASSPLTANVQ	43.12	14.896		MOD_ProDKin_1	1-7	MASSPLT	0.01543
		189	S	LSPVSSASPPAALTT	42.723	14.896			146-152	RSVSPSE
		157	S	PSERDTQSPTSVLST	39.727	14.896			154-160	DTQSPTS
		177	S	LCSLDSSSPNRSLSP	34	14.896			174-180	DSSSPNR
		183	S	SSPNRSLSPVSSASP	33.095	14.896			180-186	RSLSPVS
		258	S	TTSTYCKSPIQPLPR	28.859	14.896			186-192	SSASPPA
		149	S	DQTSRSVSPSERDTQ	27.834	14.896			255-261	YCKSPIQ
AT5G18830	SPL7	79	S	AESELDPSPEESGSG	42.743	14.896		MOD_ProDKin_1	4-10	LSQSPPP	0.01543
		70	T	PPLIPTQTPAESELD	42.586	14.896			56-62	PVLSPPL
		718	S	ERIQADCSPDSGGKE	38.96	14.896			67-73	PTQTPAE
		59	S	IHFPPVLSPPLPPLI	37.759	14.896			76-82	LDPSPEE
		7	S	*MSSLSQSPPPPEMD	36.475	14.896			301-307	FERSPSN
		431	S	RVDVKLESPKLQFVY	28.231	14.896			428-434	KLESPKL
		304	S	NDTKFERSPSNGDNK	26.19	14.896			667-673	KHQSPIE
		670	S	DIHRKHQSPIESKVN	22.477	14.896			715-721	ADCSPDS
								DOC_MAPK_gen_1	155-161	KRHRVCL	0.004324
									423-429	KRVDVKL
									461-468	KCRFLVSF
								DOC_MAPK_MEF2A_6	250-259	RAEEEPSLIF	0.002584
									401-408	RGSMTVYL
									428-436	KLESPKLQF
								DOC_MAPK_FxFP_2	436-439	FVYP	5.626e-05
AT5G46760	MYC3	278	S	PTNTGIESPARVNNG	33.448	14.896		MOD_ProDKin_1	275-281	GIESPAR	0.01543		SAANDSDHSDLEASVVK	114.71	Van Leene et al., 2019
													SAANDSDHSDLEASVVK	56.82	Roitinger et al., 2015
													SAANDSDHSDLEASVVK	56	Nakagami et al., 2010
													SAANDSDHSDLEASVVK	46	Sugiyama et al., 2008
													SAANDSDHSDLEASVVK	46	Nakagami et al., 2010
													SAANDSDHSDLEASVVK	44	Umezawa et al., 2013
													SAANDSDHSDLEASVVK	42	Sugiyama et al., 2008
													SAANDSDHSDLEASVVK	39	Nakagami et al., 2010
													SAANDSDHSDLEASVVK	37	Nakagami et al., 2010
													LDGMSKEGNNGK	37	n. a.
													SDSHQISK	36.82	Roitinger et al., 2015
													LDGMSKEGNNGK	36	n. a.
													SNETLSFCGNESSK	34.16	Roitinger et al., 2015
													SAANDSDHSDLEASVVK	33	Umezawa et al., 2013
													SAANDSDHSDLEASVVK	32	Sugiyama et al., 2008
													SAANDSDHSDLEASVVK	32	Umezawa et al., 2013
													SAANDSDHSDLEASVVK	31.99	Roitinger et al., 2015
													SAANDSDHSDLEASVVK	30	Zhang et al., 2013
													SAANDSDHSDLEASVVK	29	Sugiyama et al., 2008
													LDGMSKEGNNGK	28	n. a.
													LDGMSKEGNNGK	27	n. a.
													SDSHQISK	26.15	Roitinger et al., 2015
													LDGMSKEGNNGK	25	n. a.
													SAANDSDHSDLEASVVK	25	Umezawa et al., 2013
													SAANDSDHSDLEASVVK	24	Sugiyama et al., 2008
													SAANDSDHSDLEASVVK	23	Umezawa et al., 2013
													GSNNDEGMLSFSTVVRSAANDSDHSDLEASVVK	19	n. a.
													LDGMSKEGNNGK	16	n. a.
													SAANDSDHSDLEASVVK	4.847	Wang et al., 2013a
													SAANDSDHSDLEASVVK	3.151	Wang et al., 2013a
													SNETLSFCGNESSK	0.79975	Wang et al., 2013a
													SAANDSDHSDLEASVVK	0.75427	Wang et al., 2013a
AT5G59780	MYB59	120	S	QEKKRPMSPTSSSSN	47.715	14.896		MOD_ProDKin_1	117-123	RPMSPTS	0.01543
		196	S	LNFPPLASPTWESSL	39.761	14.896			193-199	PLASPTW
		67	T	GLKRGKMTPQEERLV	30.182	14.896
		136	T	CSSSMTTTTSQDTGG	15.746	14.896
AT5G60120	TOE2	380	T	MAAAACDTPFNFLKR	27.881	14.896		DOC_MAPK_gen_1	324-332	KQKDRALRL	0.004324
		404	S	ALPSAFFSPMERTPE	27.819	14.896		DOC_MAPK_MEF2A_6	110-117	RSTVDISF	0.002584
		409	T	FFSPMERTPEKGLML	25.141	14.896			308-317	KLDLNLGISL
								MOD_ProDKin_1	377-383	ACDTPFN	0.01543
									401-407	AFFSPME
									406-412	MERTPEK
AT5G62020	HSFB2A	22	T	SSQRSIPTPFLTKTF	35.374	14.896		MOD_ProDKin_1	134-140	MVVSPSN	0.01543		TTAVVGENSDEETPWLR	35	Zhang et al., 2013
		137	S	RNQTMVVSPSNSGED	34.385	14.896			151-157	MSSSPSS			MNSPPVDAMITGESSSQR	s.n.a.	Lin et al., 2015
		3	S	*****MNSPPVDAMI	33.529	14.896			218-224	RSYSPGG
		250	S	IEEEEEASPRLFGVP	27.918	14.896			247-253	EEASPRL
		221	S	QPTDRSYSPGGSSSQ	26.612	14.896			281-287	DEETPWL
		284	T	GENSDEETPWLRHYN	24.165	14.896		DOC_MAPK_gen_1	236-243	KRFSEMEI	0.004324
		154	S	NNQVMSSSPSSWYCH	23.038	14.896			261-270	KRTRSEGVQV
									262-270	RTRSEGVQV
								DOC_MAPK_MEF2A_6	252-260	RLFGVPIGL	0.002584
AT5G65590	SCAP1	263	S	VNSSSPSSPTKKGDN	49.602	14.896		MOD_ProDKin_1	6-12	NLPSPKP	0.01543		NLEIVNSSSPSSPTK	59	Umezawa et al., 2013
		260	S	LEIVNSSSPSSPTKK	28.862	14.896			45-51	RCNSPNT			NLEIVNSSSPSSPTK	47	Umezawa et al., 2013
		191	S	GDFNNNHSPTGFTTA	27.433	14.896			167-173	RENTPVD			NLEIVNSSSPSSPTK	35	Umezawa et al., 2013
		170	T	MSSGRENTPVDVGSG	27.236	14.896			188-194	NNHSPTG			NLEIVNSSSPSSPTK	18.55	Roitinger et al., 2015
		9	S	SSHTNLPSPKPVPKP	24.612	14.896			257-263	NSSSPSS			SSHTNLPSPKPVPK	13.38	Roitinger et al., 2015
		48	S	LKCPRCNSPNTKFCY	19.586	14.896			260-266	SPSSPTK

## Sheet: Table S2. APX1
Table S2. Prediction of transcription factors controlling the expression of APX1 under the control of MPK3, MPK4 or MPK6. Final list of transcription factors was obtained by the following workflow: First, TFs secific for cis elements present in promoter sequence of the target antioxidant gene were found using AthaMap (Gene Analysis; Upstream region: -1000, Downstream region: 50, % Restriction to …
		GPS 3.0 (CMGC/MAPK)						ELM					PhosPhAt 4.0				ATTED-II
AGI	Name	Position	Code	Peptide	Score	Cutoff		Elm Name	Position	Instances (Matched Sequence)	Probability		Peptide	Score	Source		Target	New rank	Average rank to query genes
AT1G09540	MYB61	219	T	MVGSVLQTPVCVKPS	35.743	14.896		MOD_ProDKin_1	152-158	DHKSPSS	0.01543		DKPTTSNNKR	21	n. a.
		208	S	SMIPPQFSPGNMVGS	35.67	14.896			205-211	PQFSPGN			DKPTTSNNKR	20	n. a.
		155	S	RSGNDHKSPSSSSAT	32.998	14.896			216-222	VLQTPVC			DKPTTSNNKR	18	Engelsberger and Schulze, 2012
		71	S	DLKRGAFSPEEENLI	32.372	14.896			234-240	NSSSPIS			DKPTTSNNKR	17	Engelsberger and Schulze, 2012
		301	T	KWSEYLNTPFFIGST	30.463	14.896			298-304	YLNTPFF			DKPTTSNNKR	17	Engelsberger and Schulze, 2012
		237	S	PPDNNSSSPISGGDH	29.593	14.896		DOC_MAPK_MEF2A_6	353-362	KDLQRMAVSF	0.002584		DKPTTSNNKR	17	Engelsberger and Schulze, 2012
		18	S	KLRKGLWSPEEDEKL	28.596	14.896		DOC_MAPK_HePTP_8	350-362	VFSKDLQRMAVSF	0.0001066		DKPTTSNNKR	16	n. a.
AT1G12870	Putative F-box/kelch-repeat protein	361	T	KDLVESSTPVAIYKD	23.716	14.896		MOD_ProDKin_1	139-145	CIHSPKT	0.01543		STLESCYFSQRHLKIAER	30.99	Mithoe et al., 2012
		142	S	DGIFCIHSPKTQDIY	22.677	14.896			358-364	ESSTPVA
								DOC_MAPK_gen_1	19-28	RKRRYKKLMI	0.004324
									20-28	KRRYKKLMI
									21-28	RRYKKLMI
									383-390	KRLEVLEL
									406-412	KRDALLV
								DOC_MAPK_MEF2A_6	93-102	KWNPDIEISF	0.002584
								DOC_MAPK_HePTP_8	90-102	ITEKWNPDIEISF	0.0001066
								DOC_MAPK_FxFP_2	118-121	FNFP	5.626e-05
AT1G13260	RAV1	19	T	STGSICETPAITPAK	44.688	14.896		MOD_ProDKin_1	16-22	ICETPAI	0.01543		KSSVGNLYR	33.97	Roitinger et al., 2015		APX1+MPK3	273	2.79
		23	T	ICETPAITPAKKSSV	34.328	14.896			20-26	PAITPAK			SSVGNLYR	23.2	Roitinger et al., 2015
		310	S	RLFGVNISPESSRND	31.998	14.896			190-196	KAVTPSD			MESSSVDESTTSTGSICETPAITPAK	15	n. a.
		193	T	ALFEKAVTPSDVGKL	31.937	14.896			307-313	VNISPES
		12	S	SVDESTTSTGSICET	15.231	14.896		DOC_MAPK_gen_1	264-274	KNLRAGDVVSF	0.004324
									300-309	RVLRLFGVNI
AT1G17950	MYB52	177	T	IGFRNSTTPIQEGAI	27.281	14.896		MOD_ProDKin_1	174-180	NSTTPIQ	0.01543
AT1G28300	LEC2	128	S	NNSSPNSSPSELVDS	39.628	14.896		MOD_ProDKin_1	121-127	NNSSPNS	0.01543
		124	S	MRSRNNSSPNSSPSE	31.357	14.896			125-131	PNSSPSE
								DOC_MAPK_gen_1	136-144	KRQLMMLNL	0.004324
								DOC_MAPK_MEF2A_6	136-144	KRQLMMLNL	0.002584
									137-144	RQLMMLNL
								DOC_MAPK_RevD_3	140-154	MMLNLKNNVQISDKK	0.0001805
								DOC_MAPK_FxFP_2	49-52	FSYP	5.626e-05
AT1G52150	HB15	673	S	QRVALALSPSHISSQ	41.913	14.896		MOD_ProDKin_1	118-124	RQHTPNP	0.01543
		431	S	VTITVNSSPDKLMGL	40.819	14.896			151-157	RDASPAG
		599	S	SAKQEVSSPNRTLDL	39.786	14.896			428-434	VNSSPDK
		685	T	SSQVGLRTPLGTPEA	39.209	14.896			532-538	LGHSPED
		689	T	GLRTPLGTPEAQTLA	37.713	14.896			596-602	EVSSPNR
		154	S	QNPQRDASPAGLLSI	33.712	14.896			670-676	LALSPSH
		351	S	VLRPLYESPKVLAQK	32.941	14.896			682-688	GLRTPLG
		535	S	KLEGLGHSPEDAIVP	26.032	14.896			686-692	PLGTPEA
		121	T	NSYFRQHTPNPSLPA	23.832	14.896		DOC_MAPK_MEF2A_6	434-442	KLMGLNLTF	0.002584
		22	T	NGKYVRYTPEQVEAL	22.006	14.896			631-638	RSVMTIAF
AT1G63480	AHL12	308	T	NNSEMETTPGSAAEP	42.086	14.896		MOD_ProDKin_1	118-124	RDSSPMS	0.01543		DSSPMSDPNEPK	133.95	Van Leene et al., 2019
		323	T	AASAGQQTPQNFSSQ	37.029	14.896			305-311	METTPGS			DSSPMSDPNEPK	48.37	Roitinger et al., 2015
		121	S	SNKSRDSSPMSDPNE	33.593	14.896			320-326	GQQTPQN			GWPGSGSGSGR	40.57	Roitinger et al., 2015
		311	S	EMETTPGSAAEPAAS	15.496	14.896							DSSPMSDPNEPKR	38.24	Roitinger et al., 2015
													KYGEPMVSNKSR	31.53	Roitinger et al., 2015
													SRDSSPMSDPNEPK	31.15	Roitinger et al., 2015
													SRDSSPMSDPNEPK	29.11	Roitinger et al., 2015
													SRDSSPMSDPNEPK	22.94	Roitinger et al., 2015
													DSSPMSDPNEPK	20.65	Roitinger et al., 2015
													SRDSSPMSDPNEPKR	19.23	Roitinger et al., 2015
													SRDSSPMSDPNEPKR	14.06	Roitinger et al., 2015
AT1G67710	ARR11	271	S	GVKNADSSPKDVEVN	33.209	14.896		MOD_ProDKin_1	4-10	SGFSPVG	0.01543
		485	S	QFQDYSSSPSLLSEL	32.71	14.896			268-274	ADSSPKD
		7	S	*MEKSGFSPVGLRVL	32.128	14.896			280-286	GYQSPGR
		398	T	EMKPPYETPAGGSSV	30.396	14.896			395-401	PYETPAG
		283	S	EVNSGYQSPGRSSYV	24.675	14.896			482-488	YSSSPSL
								DOC_MAPK_gen_1	326-334	KTKKTRIGF	0.004324
									328-334	KKTRIGF
AT1G69690	TCP15	200	S	GSLPTSQSPATAPFW	30.849	14.896		MOD_ProDKin_1	135-141	LRTTPSS	0.01543		SSLSAAHLR	59.33	Roitinger et al., 2015
		138	T	SAAHLRTTPSSYYFH	24.846	14.896			143-149	YFHSPHQ
		146	S	PSSYYFHSPHQSMTH	19.458	14.896			197-203	TSQSPAT
		198	S	TAGSLPTSQSPATAP	15.097	14.896
AT2G17180	DAZ1	47	S	EVGSSSSSPRPKPVT	31.436	14.896		MOD_ProDKin_1	44-50	SSSSPRP	0.01543
AT2G20570	GLK1	5	S	***MLALSPATRDGC	35.597	14.896		MOD_ProDKin_1	2-8	LALSPAT	0.01543
		339	T	HPMHNGTTPYLPTVA	32.287	14.896			325-331	VSDSPYW
		315	S	PKHLPPPSTAMPNPP	18.631	14.896			336-342	NGTTPYL
		175	T	FFLKVDWTPELHRRF	15.487	14.896		DOC_MAPK_MEF2A_6	400-409	RPWLPLPLGL	0.002584
								DOC_MAPK_DCC_7	400-409	RPWLPLPLGL	0.0004513
								DOC_MAPK_HePTP_8	397-409	VLTRPWLPLPLGL	0.0001066
AT2G23340	DEAR3	59	T	IWLGSYATPEAAARA	28.065	14.896							ETEAAVTATVTAATMGIGTRKR	24
AT2G28550	TOE1	128	T	DGETKLVTPVPTPAP	40.718	14.896		MOD_ProDKin_1	7-13	NADSPES	0.01543		VGSSSGGDESPAASASVTK	45	Zhang et al., 2013
		78	S	SSSGGDESPAASASV	39.108	14.896			75-81	GDESPAA			MLDLNLNADSPESTQYGGDSYLDR	33	Umezawa et al., 2013
		10	S	DLNLNADSPESTQYG	37.74	14.896			125-131	KLVTPVP
		132	T	KLVTPVPTPAPVPAQ	30.853	14.896			129-135	PVPTPAP
		368	T	YMGKPVNTPLPYGSS	25.88	14.896			365-371	PVNTPLP
		13	S	LNADSPESTQYGGDS	14.921	14.896		DOC_MAPK_MEF2A_6	109-116	RNWIDLSF	0.002584
								DOC_MAPK_FxFP_2	340-343	FHFP	5.626e-05
AT2G33860	ARF3	21	T	EDETQTQTPSSASGS	51.409	14.896		MOD_ProDKin_1	18-24	QTQTPSS	0.01543		VSPWEIEPSGSISNSGSFVTTGPKRSR	3.913	Wang et al., 2013a
		30	S	SSASGSVSPTSSSSA	43.434	14.896			27-33	GSVSPTS
		524	S	LPPSVSSSPSSVLLT	36.456	14.896			152-158	RSNTPHM
		383	S	NGHQQRVSPWEIEPS	27.192	14.896			340-346	ERRSPGI
		343	S	EDASERRSPGIISGI	26.534	14.896			380-386	QRVSPWE
		535	S	VLLTNSNSPNGRLED	21.151	14.896			521-527	VSSSPSS
		155	T	EVLKRSNTPHMFCKT	19.195	14.896			532-538	NSNSPNG
								DOC_MAPK_gen_1	68-76	KRGSLVLYF	0.004324
									131-140	RKVREGIIDV
									132-140	KVREGIIDV
									405-411	KRSRIGF
								DOC_MAPK_MEF2A_6	68-76	KRGSLVLYF	0.002584
									69-76	RGSLVLYF
									600-608	RDMLLDIAL
								DOC_MAPK_FxFP_2	553-556	FGFP	5.626e-05
AT2G42430	ASL18	173	S	VNPNNPVSPQSSLEE	52.211	14.896		MOD_ProDKin_1	11-17	GTGSPCG	0.01543
		14	S	GTTAGTGSPCGACKF	39.223	14.896			143-149	TSVSPIG
		146	S	TWQQTSVSPIGSAYS	33.791	14.896			151-157	AYSTPYN
		154	T	PIGSAYSTPYNHHQP	23.796	14.896			170-176	NPVSPQS
								DOC_MAPK_MEF2A_6	59-66	KLLLNVPI	0.002584
AT2G45190	YAB1	8	S	MSMSSMSSPSSAVCS	44.315	14.896		MOD_ProDKin_1	5-11	SMSSPSS	0.01543
		227	T	AAANVGVTPY*****	36.073	14.896			12-18	AVCSPDH
		15	S	SPSSAVCSPDHFSPS	34.569	14.896			17-23	DHFSPSD
		20	S	VCSPDHFSPSDHLCY	16.45	14.896
AT2G46590	DAG2	226	S	SVYGSSSSPVSALEL	40.632	14.896		MOD_ProDKin_1	223-229	SSSSPVS	0.01543
		350	S	NNNNNNSSPNNGYWS	30.75	14.896			347-353	NNSSPNN
AT2G46830	CCA1	537	T	LNFTAQLTPVDDQEE	42.307	14.896		MOD_ProDKin_1	272-278	LLQTPAL	0.01543		LMSRGRTGFKPYK	25.1	Mithoe et al., 2012
		275	T	IMSTLLQTPALYTAA	38.475	14.896			294-300	SGGSPVP
		297	S	PPDSSGGSPVPGNSP	35.285	14.896			300-306	PGNSPPN
		303	S	GSPVPGNSPPNLAAM	34.683	14.896			400-406	PSATPES
		403	T	CHEQPSATPESDAKG	34.282	14.896			426-432	GSNTPSS
		429	T	RSSCGSNTPSSSDDV	28.36	14.896			534-540	AQLTPVD
		406	S	QPSATPESDAKGSDG	16.83	14.896		DOC_MAPK_gen_1	545-553	KRNTGFLGI	0.004324
								DOC_MAPK_MEF2A_6	523-532	RYPMALDLNF	0.002584
									546-555	RNTGFLGIGL
AT3G04060	NAC046	301	T	SDVNTTATPEISSYP	42.404	14.896		MOD_ProDKin_1	298-304	TTATPEI	0.01543
		176	T	FHKNAPSTTITTTKQ	20.962	14.896		DOC_MAPK_gen_1	39-47	KEKVFNIRF	0.004324
AT3G08500	MYB83	147	S	NNTSSGSSPNNSNSN	42.144	14.896		MOD_ProDKin_1	144-150	SGSSPNN	0.01543
		195	S	TMRMDSSSPFNVGPM	26.314	14.896			192-198	DSSSPFN
		89	S	DLKRGSFSPQEEDLI	26.017	14.896
		36	S	KLRKGLWSPDEDEKL	24.64	14.896
AT3G18400	NAC058	251	S	SLLGPPLSPINSLLL	54.715	14.896		MOD_ProDKin_1	170-176	SFGSPCD	0.01543
		173	S	SSQPSFGSPCDANSS	34.13	14.896			248-254	PPLSPIN
								DOC_MAPK_gen_1	25-32	RKVSDIGF	0.004324
								DOC_MAPK_MEF2A_6	35-42	KAVVDVDL	0.002584
									97-104	RSGVLVGM
AT3G24520	HSFC1	318	T	VESNPPTTPPYPFSL	57.702	14.896		MOD_ProDKin_1	220-226	SSSTPSP	0.01543
		225	S	VMSSSTPSPSSTENL	48.689	14.896			222-228	STPSPSS
		223	T	FRVMSSSTPSPSSTE	37.781	14.896			234-240	RNHSPDG
		269	S	MLSNSTSSTSSSLTS	17.258	14.896			315-321	PPTTPPY
		276	S	STSSSLTSTFSLPES	15.281	14.896
AT3G45150	TCP16	16	T	NSQKARRTPKDRHLK	19.252	14.896		MOD_ProDKin_1	13-19	ARRTPKD	0.01543
		159	T	DTTSAATTTATTTV*	17.116	14.896		DOC_MAPK_gen_1	14-24	RRTPKDRHLKI	0.004324
		162	T	SAATTTATTTV****	14.952	14.896			15-24	RTPKDRHLKI
AT3G53600	Putative C2H2-zinc-finger-type	151	T	EILDLNLTPLENDLV	40.602	14.896		MOD_ProDKin_1	148-154	LNLTPLE	0.01543
								DOC_MAPK_gen_1	72-78	KKPKLIV	0.004324
								DOC_MAPK_MEF2A_6	143-150	KEILDLNL	0.002584
									163-171	KNLVPQIDL
								DOC_MAPK_DCC_7	163-171	KNLVPQIDL	0.0004513
AT4G01680	MYB55	18	S	KLRKGLWSPEEDEKL	28.596	14.896		-	-	-	-		YGHGCWSSVPK	24	n. a.
		176	S	SSSTTTCSTNQNNNT	16.799	14.896
AT4G14465	AHL20	166	S	GAFLPGPSPPGSTGL	36.681	14.896		MOD_ProDKin_1	87-93	TRDSPNA	0.01543		LPMEEEEDGGGSR	28	Zhang et al., 2013
		90	S	PIFVTRDSPNALRSH	32.417	14.896			231-237	GGDSPPR			QIHGGGDSPPR	21	Zhang et al., 2013
		234	S	QIHGGGDSPPRIGSN	27.187	14.896		DOC_MAPK_gen_1	77-86	KNKPKAPIFV	0.004324
		170	S	PGPSPPGSTGLTVYL	21.144	14.896			79-86	KPKAPIFV
								DOC_MAPK_MEF2A_6	36-43	KGDLGIAM	0.002584
AT4G31920	RR10	356	S	SFTSQQNSPMVAPSN	43.114	14.896		MOD_ProDKin_1	353-359	QQNSPMV	0.01543
		426	S	NAFCDSASPLVNPNL	33.181	14.896			380-386	PGFSPHF
		383	S	LPSNPGFSPHFEISK	27.588	14.896			423-429	DSASPLV
		401	S	HWSNAALSTNIPQSD	15.62	14.896		DOC_MAPK_FxFP_2	456-459	FFYP	5.626e-05
AT4G35390	AGF1	45	T	DEAKAETTPTGGATS	47.396	14.896		MOD_ProDKin_1	20-26	DSRTPPD	0.01543		NKPKPPTIITR	99	Engelsberger and Schulze, 2012
		219	T	LPIEEEETPPPRTTG	32.732	14.896			42-48	AETTPTG			AETTPTGGATSSATASGSSSGR	40	Zhang et al., 2013
		86	S	PTIITRDSPNVLRSH	30.003	14.896			83-89	TRDSPNV			AETTPTGGATSSATASGSSSGR	33	Zhang et al., 2013
		23	T	QRPEDSRTPPDQNNM	26.748	14.896			216-222	EEETPPP			AETTPTGGATSSATASGSSSGR	30	Zhang et al., 2013
													LPIEEEETPPPR	30	Zhang et al., 2013
													NKPKPPTIITR	26	Engelsberger and Schulze, 2012
													NKPKPPTIITR	24	Engelsberger and Schulze, 2012
AT4G35550	WOX13	120	T	IFDQGTGTPSKQKIK	37.073	14.896		MOD_ProDKin_1	221-227	CFQSPEI	0.01543
		224	S	PEDLCFQSPEISSDL	35.563	14.896		DOC_MAPK_gen_1	184-195	KRVVRPESLLGL	0.004324
		103	T	ARQRWTPTPVQLQIL	33.499	14.896			185-195	RVVRPESLLGL
		101	T	MTARQRWTPTPVQLQ	19.293	14.896
		211	T	GLGTTTATTTAPRPE	17.623	14.896
		207	T	SNNNGLGTTTATTTA	15.307	14.896
AT4G35610	Putative C2H2-zinc-finger-type	259	S	AKFDLNKSPPKDEEE	31.176	14.896		MOD_ProDKin_1	256-262	LNKSPPK	0.01543		SSGDFSGSGGGDAPGSEGGR	95.38	Mayank et al., 2012
								DOC_MAPK_MEF2A_6	228-236	RGSGIDLNV	0.002584		ISTQTDDEGDGLGEGEAK	94.6	Mayank et al., 2012
													IFGESSSVVEEDAEK	43.07	Mayank et al., 2012
AT5G03790	HB51	44	T	PYAGNSYTPGDTQTG	32.317	14.896		MOD_ProDKin_1	41-47	NSYTPGD	0.01543
AT5G04340	ZAT6	8	S	MALETLTSPRLSSPM	44.258	14.896		MOD_ProDKin_1	5-11	TLTSPRL	0.01543						APX1+MPK3	134	3.38
		77	S	DLPSSSSSPPLLPPL	42.094	14.896			10-16	RLSSPMP
		223	S	NGDEEVMSPMPAKKL	32.36	14.896			74-80	SSSSPPL
		13	S	LTSPRLSSPMPTLFQ	32.35	14.896			220-226	EVMSPMP
		86	T	PLLPPLPTPIYKCSV	27.564	14.896		DOC_MAPK_FxFP_2	232-235	FDFP	5.626e-05
AT5G12870	MYB46	138	S	LINNSSSSPNTASDS	40.61	14.896		MOD_ProDKin_1	135-141	SSSSPNT	0.01543
		77	S	DLKRGAFSPQEEDLI	32.074	14.896			196-202	DDFTPYV
		24	S	KMKKGLWSPEEDSKL	27.209	14.896		DOC_MAPK_gen_1	2-8	RKPEVAI	0.004324
		199	T	HPCNDDFTPYVDGIY	26.19	14.896
AT5G13790	AGL15	257	S	DQSSLANSPPEAKRQ	35.319	14.896		MOD_ProDKin_1	228-234	ERESPSS	0.01543
		231	S	TNEGERESPSSDSVT	31.125	14.896			254-260	LANSPPE
		234	S	GERESPSSDSVTTNT	20.141	14.896
AT5G16560	KAN1	164	S	AYRSLQSSPRLKGVP	37.945	14.896		MOD_ProDKin_1	161-167	LQSSPRL	0.01543		AQSDDTSLHQETDISSTQPR	32.25	Roitinger et al., 2015
		246	T	LGGHERATPKSVLEL	27.127	14.896			188-194	DSSSPHH
		191	S	VGSSDSSSPHHHNHH	20.78	14.896
		16	T	EKTKTNTTTTLPDLS	16.816	14.896
AT5G17300	RVE1	4	S	****MASSPLTANVQ	43.12	14.896		MOD_ProDKin_1	1-7	MASSPLT	0.01543
		189	S	LSPVSSASPPAALTT	42.723	14.896			146-152	RSVSPSE
		157	S	PSERDTQSPTSVLST	39.727	14.896			154-160	DTQSPTS
		177	S	LCSLDSSSPNRSLSP	34	14.896			174-180	DSSSPNR
		183	S	SSPNRSLSPVSSASP	33.095	14.896			180-186	RSLSPVS
		258	S	TTSTYCKSPIQPLPR	28.859	14.896			186-192	SSASPPA
		149	S	DQTSRSVSPSERDTQ	27.834	14.896			255-261	YCKSPIQ
AT5G18830	SPL7	79	S	AESELDPSPEESGSG	42.743	14.896		MOD_ProDKin_1	4-10	LSQSPPP	0.01543
		70	T	PPLIPTQTPAESELD	42.586	14.896			56-62	PVLSPPL
		718	S	ERIQADCSPDSGGKE	38.96	14.896			67-73	PTQTPAE
		59	S	IHFPPVLSPPLPPLI	37.759	14.896			76-82	LDPSPEE
		7	S	*MSSLSQSPPPPEMD	36.475	14.896			301-307	FERSPSN
		431	S	RVDVKLESPKLQFVY	28.231	14.896			428-434	KLESPKL
		304	S	NDTKFERSPSNGDNK	26.19	14.896			667-673	KHQSPIE
		670	S	DIHRKHQSPIESKVN	22.477	14.896			715-721	ADCSPDS
								DOC_MAPK_gen_1	155-161	KRHRVCL	0.004324
									423-429	KRVDVKL
									461-468	KCRFLVSF
								DOC_MAPK_MEF2A_6	250-259	RAEEEPSLIF	0.002584
									401-408	RGSMTVYL
									428-436	KLESPKLQF
								DOC_MAPK_FxFP_2	436-439	FVYP	5.626e-05
AT5G25830	GATA12	184	S	QHLSPPTSPPLLMAP	62.17	14.896		MOD_ProDKin_1	91-97	ESLSPED	0.01543
		119	S	DPKSDTGSPENPNSS	50.195	14.896			116-122	DTGSPEN
		210	S	RRKKDVSSPESGGAE	36.496	14.896			124-130	NSSSPIF
		180	S	LSSQQHLSPPTSPPL	34.487	14.896			162-168	FYDSPFT
		94	S	NIVDESLSPEDVHKL	30.719	14.896			177-183	QHLSPPT
		165	S	LKETFYDSPFTGETI	28.68	14.896			181-187	PPTSPPL
		264	S	PEYRPAASPTFVLAK	28.607	14.896			207-213	DVSSPES
		229	T	LHCATDKTPQWRTGP	28.441	14.896
		127	S	PENPNSSSPIFTTDV	27.834	14.896
		40	T	VVADSTTTTTITDSS	18.211	14.896
		41	T	VADSTTTTTITDSSN	15.417	14.896
		38	T	NDVVADSTTTTTITD	14.992	14.896
AT5G28300	GT2L	388	S	DVVQNPTSPSQDSSS	59.019	14.896		MOD_ProDKin_1	13-19	FIASPPP	0.01543		DQDQGQVEEASMENQR	64.28	Roitinger et al., 2015
		419	T	SLLPQTLTPHNLLTI	45.97	14.896			139-145	FKRSPQE			FTDHDLDVVQNPTSPSQDSSSLALR	30	Zhang et al., 2013
		16	S	QIHRFIASPPPPPPL	29.788	14.896			385-391	NPTSPSQ			FTDHDLDVVQNPTSPSQDSSSLALR	s.n.a.	Choudhary et al., 2015
		566	T	PPTGTTATTATTATS	21.41	14.896			416-422	QTLTPHN			FTDHDLDVVQNPTSPSQDSSSLALR	s.n.a.	Wang et al., 2013b
		142	S	AEVGFKRSPQECKEK	19.157	14.896		DOC_MAPK_gen_1	132-139	RKLAEVGF	0.004324		FTDHDLDVVQNPTSPSQDSSSLALR	s.n.a.	Hoehenwarter et al., 2013
		563	T	YSQPPTGTTATTATT	17.512	14.896		DOC_MAPK_DCC_7	32-40	RSLPFPVSF	0.0004513		FTDHDLDVVQNPTSPSQDSSSLALR	s.n.a.	Wang et al., 2013b
		434	S	DKSLEPFSTKTLKPK	15.989	14.896							FTDHDLDVVQNPTSPSQDSSSLALR	s.n.a.	Wang et al., 2013b
													FTDHDLDVVQNPTSPSQDSSSLALR	s.n.a.	Wang et al., 2013b
													FTDHDLDVVQNPTSPSQDSSSLALR	s.n.a.	Xue et al., 2013
													FISKFTDHDLDVVQNPTSPSQDSSSLALR	s.n.a.	Hoehenwarter et al., 2013
AT5G42630	KAN4	198	S	DEGTDTNSPNSSSVQ	41.182	14.896		MOD_ProDKin_1	164-170	DKGSPGE	0.01543
		167	S	VKCTDKGSPGEGKVE	29.063	14.896			195-201	DTNSPNS
		132	T	LGGHERATPKSVLEL	27.127	14.896		DOC_MAPK_MEF2A_6	62-69	KPLLSLGF	0.002584
									242-251	KEDTNIHLNL
								DOC_MAPK_DCC_7	11-21	RASNSVPDLSL	0.0004513
AT5G46760	MYC3	278	S	PTNTGIESPARVNNG	33.448	14.896		MOD_ProDKin_1	275-281	GIESPAR	0.01543		SAANDSDHSDLEASVVK	114.71	Van Leene et al., 2019
													SAANDSDHSDLEASVVK	114.71	Van Leene et al., 2019
													SAANDSDHSDLEASVVK	56.82	Roitinger et al., 2015
													SAANDSDHSDLEASVVK	56	Nakagami et al., 2010
													SAANDSDHSDLEASVVK	46	Sugiyama et al., 2008
													SAANDSDHSDLEASVVK	46	Nakagami et al., 2010
													SAANDSDHSDLEASVVK	44	Umezawa et al., 2013
													SAANDSDHSDLEASVVK	42	Sugiyama et al., 2008
													SAANDSDHSDLEASVVK	39	Nakagami et al., 2010
													SAANDSDHSDLEASVVK	37	Nakagami et al., 2010
													LDGMSKEGNNGK	37	n. a.
													SDSHQISK	36.82	Roitinger et al., 2015
													LDGMSKEGNNGK	36	n. a.
													SNETLSFCGNESSK	34.16	Roitinger et al., 2015
													SAANDSDHSDLEASVVK	33	Umezawa et al., 2013
													SAANDSDHSDLEASVVK	32	Sugiyama et al., 2008
													SAANDSDHSDLEASVVK	32	Umezawa et al., 2013
													SAANDSDHSDLEASVVK	31.99	Roitinger et al., 2015
													SAANDSDHSDLEASVVK	30	Zhang et al., 2013
													SAANDSDHSDLEASVVK	30	Zhang et al., 2013
													SAANDSDHSDLEASVVK	29	Sugiyama et al., 2008
													LDGMSKEGNNGK	28	n. a.
													LDGMSKEGNNGK	27	n. a.
													SDSHQISK	26.15	Roitinger et al., 2015
													LDGMSKEGNNGK	25	n. a.
													SAANDSDHSDLEASVVK	25	Umezawa et al., 2013
													SAANDSDHSDLEASVVK	24	Sugiyama et al., 2008
													SAANDSDHSDLEASVVK	23	Umezawa et al., 2013
													GSNNDEGMLSFSTVVRSAANDSDHSDLEASVVK	19	n. a.
													LDGMSKEGNNGK	16	n. a.
													SAANDSDHSDLEASVVK	4.847	Wang et al., 2013a
													SAANDSDHSDLEASVVK	3.151	Wang et al., 2013a
													SNETLSFCGNESSK	0.79975	Wang et al., 2013a
													SAANDSDHSDLEASVVK	0.75427	Wang et al., 2013a
AT5G59780	MYB59	120	S	QEKKRPMSPTSSSSN	47.715	14.896		MOD_ProDKin_1	117-123	RPMSPTS	0.01543
		196	S	LNFPPLASPTWESSL	39.761	14.896			193-199	PLASPTW
		67	T	GLKRGKMTPQEERLV	30.182	14.896
		136	T	CSSSMTTTTSQDTGG	15.746	14.896
AT5G60120	TOE2	380	T	MAAAACDTPFNFLKR	27.881	14.896		MOD_ProDKin_1	377-383	ACDTPFN	0.01543
		404	S	ALPSAFFSPMERTPE	27.819	14.896			401-407	AFFSPME
		409	T	FFSPMERTPEKGLML	25.141	14.896			406-412	MERTPEK
								DOC_MAPK_gen_1	324-332	KQKDRALRL	0.004324
								DOC_MAPK_MEF2A_6	110-117	RSTVDISF	0.002584
									308-317	KLDLNLGISL
AT5G62020	HSFB2A	22	T	SSQRSIPTPFLTKTF	35.374	14.896		MOD_ProDKin_1	134-140	MVVSPSN	0.01543		TTAVVGENSDEETPWLR	35	Zhang et al., 2013
		137	S	RNQTMVVSPSNSGED	34.385	14.896			151-157	MSSSPSS			MNSPPVDAMITGESSSQR	s.n.a.	Lin et al., 2015
		3	S	*****MNSPPVDAMI	33.529	14.896			218-224	RSYSPGG
		250	S	IEEEEEASPRLFGVP	27.918	14.896			247-253	EEASPRL
		221	S	QPTDRSYSPGGSSSQ	26.612	14.896			281-287	DEETPWL
		284	T	GENSDEETPWLRHYN	24.165	14.896		DOC_MAPK_gen_1	236-243	KRFSEMEI	0.004324
		154	S	NNQVMSSSPSSWYCH	23.038	14.896			261-270	KRTRSEGVQV
									262-270	RTRSEGVQV
								DOC_MAPK_MEF2A_6	252-260	RLFGVPIGL	0.002584
AT5G65590	SCAP1	263	S	VNSSSPSSPTKKGDN	49.602	14.896		MOD_ProDKin_1	6-12	NLPSPKP	0.01543		NLEIVNSSSPSSPTK	59	Umezawa et al., 2013
		260	S	LEIVNSSSPSSPTKK	28.862	14.896			45-51	RCNSPNT			NLEIVNSSSPSSPTK	47	Umezawa et al., 2013
		191	S	GDFNNNHSPTGFTTA	27.433	14.896			167-173	RENTPVD			NLEIVNSSSPSSPTK	35	Umezawa et al., 2013
		170	T	MSSGRENTPVDVGSG	27.236	14.896			188-194	NNHSPTG			NLEIVNSSSPSSPTK	18.55	Roitinger et al., 2015
		9	S	SSHTNLPSPKPVPKP	24.612	14.896			257-263	NSSSPSS			SSHTNLPSPKPVPK	13.38	Roitinger et al., 2015
		48	S	LKCPRCNSPNTKFCY	19.586	14.896			260-266	SPSSPTK

## Sheet: Table S3. DHAR1
Table S3. Prediction of transcription factors controlling the expression of DHAR1 under the control of MPK3, MPK4 or MPK6. Final list of transcription factors was obtained by the following workflow: First, TFs secific for cis elements present in promoter sequence of the target antioxidant gene were found using AthaMap (Gene Analysis; Upstream region: -1000, Downstream region: 50, % Restriction to…
		GPS 3.0 (CMGC/MAPK)						ELM					PhosPhAt 4.0				ATTED-II
AGI	Name	Position	Code	Peptide	Score	Cutoff		Elm Name	Position	Instances (Matched Sequence)	Probability		Peptide	Score	Source		Target	New rank	Average rank to query genes
AT1G09540	MYB61	219	T	MVGSVLQTPVCVKPS	35.743	14.896		MOD_ProDKin_1	152-158	DHKSPSS	0.01543		DKPTTSNNKR	21	Engelsberger and Schulze, 2012
		208	S	SMIPPQFSPGNMVGS	35.67	14.896			205-211	PQFSPGN			DKPTTSNNKR	21	n. a.
		155	S	RSGNDHKSPSSSSAT	32.998	14.896			216-222	VLQTPVC			DKPTTSNNKR	20	n. a.
		71	S	DLKRGAFSPEEENLI	32.372	14.896			234-240	NSSSPIS			DKPTTSNNKR	18	Engelsberger and Schulze, 2012
		301	T	KWSEYLNTPFFIGST	30.463	14.896			298-304	YLNTPFF			DKPTTSNNKR	17	Engelsberger and Schulze, 2012
		237	S	PPDNNSSSPISGGDH	29.593	14.896		DOC_MAPK_MEF2A_6	353-362	KDLQRMAVSF	0.002584		DKPTTSNNKR	17	Engelsberger and Schulze, 2012
		18	S	KLRKGLWSPEEDEKL	28.596	14.896		DOC_MAPK_HePTP_8	350-362	VFSKDLQRMAVSF	0.0001066		DKPTTSNNKR	17	Engelsberger and Schulze, 2012
													DKPTTSNNKR	16	Engelsberger and Schulze, 2012
													DKPTTSNNKR	16	n. a.
													DKPTTSNNKR	16	n. a.
AT1G12870	Putative F-box/kelch-repeat protein	361	T	KDLVESSTPVAIYKD	23.716	14.896		MOD_ProDKin_1	139-145	CIHSPKT	0.01543		STLESCYFSQRHLKIAER	30.99	Mithoe et al., 2012
		142	S	DGIFCIHSPKTQDIY	22.677	14.896			358-364	ESSTPVA
								DOC_MAPK_gen_1	19-28	RKRRYKKLMI	0.004324
									20-28	KRRYKKLMI
									21-28	RRYKKLMI
									383-390	KRLEVLEL
									406-412	KRDALLV
								DOC_MAPK_MEF2A_6	93-102	KWNPDIEISF	0.002584
								DOC_MAPK_HePTP_8	90-102	ITEKWNPDIEISF	0.0001066
								DOC_MAPK_FxFP_2	118-121	FNFP	5.626e-05
AT1G13260	RAV1	19	T	STGSICETPAITPAK	44.688	14.896		MOD_ProDKin_1	16-22	ICETPAI	0.01543		KSSVGNLYR	33.97	Roitinger et al., 2015
		23	T	ICETPAITPAKKSSV	34.328	14.896			20-26	PAITPAK			SSVGNLYR	23.2	Roitinger et al., 2015
		310	S	RLFGVNISPESSRND	31.998	14.896			190-196	KAVTPSD			MESSSVDESTTSTGSICETPAITPAK	15	n. a.
		193	T	ALFEKAVTPSDVGKL	31.937	14.896			307-313	VNISPES
		12	S	SVDESTTSTGSICET	15.231	14.896		DOC_MAPK_gen_1	264-274	KNLRAGDVVSF	0.004324
									300-309	RVLRLFGVNI
AT1G32640	MYC2	52	T	ATTETTPTPAMEIPA	47.296	14.896		MOD_ProDKin_1	47-53	TETTPTP	0.01543		TAGESDHSDLEASVVK	93.776	Van Leene et al., 2019
		330	S	PNLDPTPSPVHSQTQ	42.998	14.896			49-55	TTPTPAM			SGEILNFGDEGK	70.8	Roitinger et al., 2015
		50	T	TTATTETTPTPAMEI	41.111	14.896			120-126	RSSSPPF			TAGESDHSDLEASVVK	51	Umezawa et al., 2013
		287	T	WINDPIGTPGSNEPG	35.021	14.896			125-131	PFSTPAD			TAGESDHSDLEASVVK	50.21	Roitinger et al., 2015
		328	T	ENPNLDPTPSPVHSQ	33.46	14.896			284-290	PIGTPGS			SGEILNFGDEGKR	44.31	Roitinger et al., 2015
		123	S	NPRRRSSSPPFSTPA	24.635	14.896			325-331	LDPTPSP			TAGESDHSDLEASVVK	44	Nakagami et al., 2010
		128	T	SSSPPFSTPADQEYR	24.366	14.896			327-333	PTPSPVH			SGEILNFGDEGK	39	Umezawa et al., 2013
		43	T	PPASTTTTTATTETT	24.019	14.896		DOC_MAPK_gen_1	360-369	KPRSGEILNF	0.004324		TAGESDHSDLEASVVK	33	Sugiyama et al., 2008
		42	T	WPPASTTTTTATTET	21.575	14.896			394-401	KRKRSMVL			TAGESDHSDLEASVVK	33	Umezawa et al., 2013
		46	T	STTTTTATTETTPTP	20.049	14.896			395-401	RKRSMVL			TAGESDHSDLEASVVK	31	Nakagami et al., 2010
		39	S	STLWPPASTTTTTAT	19.119	14.896		DOC_MAPK_MEF2A_6	542-550	KPVGMEIEV	0.002584		TAGESDHSDLEASVVK	4.23	Wang et al., 2013b
		40	T	TLWPPASTTTTTATT	15.84	14.896							SSSPPFSTPADQEYR	3.397	Wang et al., 2013b
		49	T	TTTATTETTPTPAME	15.618	14.896							SGEILNFGDEGK	s. n. a.	Bhaskara et al., 2017
AT1G52150	HB15	673	S	QRVALALSPSHISSQ	41.913	14.896		MOD_ProDKin_1	118-124	RQHTPNP	0.01543
		431	S	VTITVNSSPDKLMGL	40.819	14.896			151-157	RDASPAG
		599	S	SAKQEVSSPNRTLDL	39.786	14.896			428-434	VNSSPDK
		685	T	SSQVGLRTPLGTPEA	39.209	14.896			532-538	LGHSPED
		689	T	GLRTPLGTPEAQTLA	37.713	14.896			596-602	EVSSPNR
		154	S	QNPQRDASPAGLLSI	33.712	14.896			670-676	LALSPSH
		351	S	VLRPLYESPKVLAQK	32.941	14.896			682-688	GLRTPLG
		535	S	KLEGLGHSPEDAIVP	26.032	14.896			686-692	PLGTPEA
		121	T	NSYFRQHTPNPSLPA	23.832	14.896		DOC_MAPK_MEF2A_6	434-442	KLMGLNLTF	0.002584
		22	T	NGKYVRYTPEQVEAL	22.006	14.896			631-638	RSVMTIAF
AT1G63480	AHL12	308	T	NNSEMETTPGSAAEP	42.086	14.896		MOD_ProDKin_1	118-124	RDSSPMS	0.01543		DSSPMSDPNEPK	133.95	Van Leene et al., 2019
		323	T	AASAGQQTPQNFSSQ	37.029	14.896			305-311	METTPGS			DSSPMSDPNEPK	48.37	Roitinger et al., 2015
		121	S	SNKSRDSSPMSDPNE	33.593	14.896			320-326	GQQTPQN			GWPGSGSGSGR	40.57	Roitinger et al., 2015
		311	S	EMETTPGSAAEPAAS	15.496	14.896							DSSPMSDPNEPKR	38.24	Roitinger et al., 2015
													KYGEPMVSNKSR	31.53	Roitinger et al., 2015
													SRDSSPMSDPNEPK	31.15	Roitinger et al., 2015
													SRDSSPMSDPNEPK	29.11	Roitinger et al., 2015
													SRDSSPMSDPNEPK	22.94	Roitinger et al., 2015
													DSSPMSDPNEPK	20.65	Roitinger et al., 2015
													SRDSSPMSDPNEPKR	19.23	Roitinger et al., 2015
													SRDSSPMSDPNEPKR	14.06	Roitinger et al., 2015
AT1G67710	ARR11	271	S	GVKNADSSPKDVEVN	33.209	14.896		MOD_ProDKin_1	4-10	SGFSPVG	0.01543
		485	S	QFQDYSSSPSLLSEL	32.71	14.896			268-274	ADSSPKD
		7	S	*MEKSGFSPVGLRVL	32.128	14.896			280-286	GYQSPGR
		398	T	EMKPPYETPAGGSSV	30.396	14.896			395-401	PYETPAG
		283	S	EVNSGYQSPGRSSYV	24.675	14.896			482-488	YSSSPSL
								DOC_MAPK_gen_1	326-334	KTKKTRIGF	0.004324
									328-334	KKTRIGF
AT1G74930	ORA47	127	S	GSEIRPESPSTSASV	45.147	14.896		MOD_ProDKin_1	87-93	KSLTPPE	0.01543
		90	T	ISVEKSLTPPEIQEA	34.458	14.896			124-130	RPESPST
		52	T	IWLGSYDTPEKAARA	25.572	14.896
AT2G17180	DAZ1	47	S	EVGSSSSSPRPKPVT	31.436	14.896		MOD_ProDKin_1	44-50	SSSSPRP	0.01543
AT2G20570	GLK1	5	S	***MLALSPATRDGC	35.597	14.896		MOD_ProDKin_1	2-8	LALSPAT	0.01543
		339	T	HPMHNGTTPYLPTVA	32.287	14.896			325-331	VSDSPYW
		315	S	PKHLPPPSTAMPNPP	18.631	14.896			336-342	NGTTPYL
		175	T	FFLKVDWTPELHRRF	15.487	14.896		DOC_MAPK_MEF2A_6	400-409	RPWLPLPLGL	0.002584
								DOC_MAPK_DCC_7	400-409	RPWLPLPLGL	0.0004513
								DOC_MAPK_HePTP_8	397-409	VLTRPWLPLPLGL	0.0001066
AT2G23340	DEAR3	59	T	IWLGSYATPEAAARA	28.065	14.896		-	-	-	-		ETEAAVTATVTAATMGIGTRKR	24	n. a.
AT2G28550	TOE1	128	T	DGETKLVTPVPTPAP	40.718	14.896		MOD_ProDKin_1	7-13	NADSPES	0.01543		VGSSSGGDESPAASASVTK	45	Zhang et al., 2013
		78	S	SSSGGDESPAASASV	39.108	14.896			75-81	GDESPAA			MLDLNLNADSPESTQYGGDSYLDR	33	Umezawa et al., 2013
		10	S	DLNLNADSPESTQYG	37.74	14.896			125-131	KLVTPVP
		132	T	KLVTPVPTPAPVPAQ	30.853	14.896			129-135	PVPTPAP
		368	T	YMGKPVNTPLPYGSS	25.88	14.896			365-371	PVNTPLP
		13	S	LNADSPESTQYGGDS	14.921	14.896		DOC_MAPK_MEF2A_6	109-116	RNWIDLSF	0.002584
								DOC_MAPK_FxFP_2	340-343	FHFP	5.626e-05
AT2G33860	ARF3	21	T	EDETQTQTPSSASGS	51.409	14.896		MOD_ProDKin_1	18-24	QTQTPSS	0.01543		VSPWEIEPSGSISNSGSFVTTGPKRSR	3.913	Wang et al., 2013b
		30	S	SSASGSVSPTSSSSA	43.434	14.896			27-33	GSVSPTS
		524	S	LPPSVSSSPSSVLLT	36.456	14.896			152-158	RSNTPHM
		383	S	NGHQQRVSPWEIEPS	27.192	14.896			340-346	ERRSPGI
		343	S	EDASERRSPGIISGI	26.534	14.896			380-386	QRVSPWE
		535	S	VLLTNSNSPNGRLED	21.151	14.896			521-527	VSSSPSS
		155	T	EVLKRSNTPHMFCKT	19.195	14.896			532-538	NSNSPNG
								DOC_MAPK_gen_1	68-76	KRGSLVLYF	0.004324
									131-140	RKVREGIIDV
									132-140	KVREGIIDV
									405-411	KRSRIGF
								DOC_MAPK_MEF2A_6	68-76	KRGSLVLYF	0.002584
									69-76	RGSLVLYF
									600-608	RDMLLDIAL
								DOC_MAPK_FxFP_2	553-556	FGFP	5.626e-05
AT2G42430	ASL18	173	S	VNPNNPVSPQSSLEE	52.211	14.896		MOD_ProDKin_1	11-17	GTGSPCG	0.01543
		14	S	GTTAGTGSPCGACKF	39.223	14.896			143-149	TSVSPIG
		146	S	TWQQTSVSPIGSAYS	33.791	14.896			151-157	AYSTPYN
		154	T	PIGSAYSTPYNHHQP	23.796	14.896			170-176	NPVSPQS
								DOC_MAPK_MEF2A_6	59-66	KLLLNVPI
AT2G44745	WRKY12	53	S	SSSSSLSSPSFPIHN	41.902	14.896		MOD_ProDKin_1	50-56	SLSSPSF	0.01543
		209	S	IPSDDSTSPDHDCLS	37.233	14.896			206-212	DSTSPDH
		66	T	HNSSSTTTTHAPLGF	17.317	14.896
AT2G46590	DAG2	226	S	SVYGSSSSPVSALEL	40.632	14.896		MOD_ProDKin_1	223-229	SSSSPVS	0.01543
		350	S	NNNNNNSSPNNGYWS	30.75	14.896			347-353	NNSSPNN
AT2G46830	CCA1	537	T	LNFTAQLTPVDDQEE	42.307	14.896		MOD_ProDKin_1	272-278	LLQTPAL	0.01543		LMSRGRTGFKPYK	25.1	Mithoe et al., 2012
		275	T	IMSTLLQTPALYTAA	38.475	14.896			294-300	SGGSPVP
		297	S	PPDSSGGSPVPGNSP	35.285	14.896			300-306	PGNSPPN
		303	S	GSPVPGNSPPNLAAM	34.683	14.896			400-406	PSATPES
		403	T	CHEQPSATPESDAKG	34.282	14.896			426-432	GSNTPSS
		429	T	RSSCGSNTPSSSDDV	28.36	14.896			534-540	AQLTPVD
		406	S	QPSATPESDAKGSDG	16.83	14.896		DOC_MAPK_gen_1	545-553	KRNTGFLGI	0.004324
								DOC_MAPK_MEF2A_6	523-532	RYPMALDLNF	0.002584
									546-555	RNTGFLGIGL
AT3G01470	HB	256	S	DVFVPTTSPSHDHHG	41.059	14.896		MOD_ProDKin_1	48-54	FFSSPED	0.01543
		51	S	KRRPFFSSPEDLYDD	28.445	14.896			253-259	PTTSPSH
AT3G08500	MYB83	147	S	NNTSSGSSPNNSNSN	42.144	14.896		MOD_ProDKin_1	144-150	SGSSPNN	0.01543
		195	S	TMRMDSSSPFNVGPM	26.314	14.896			192-198	DSSSPFN
		89	S	DLKRGSFSPQEEDLI	26.017	14.896
		36	S	KLRKGLWSPDEDEKL	24.64	14.896
AT3G18400	NAC058	251	S	SLLGPPLSPINSLLL	54.715	14.896		MOD_ProDKin_1	170-176	SFGSPCD	0.01543
		173	S	SSQPSFGSPCDANSS	34.13	14.896			248-254	PPLSPIN
								DOC_MAPK_gen_1	25-32	RKVSDIGF	0.004324
								DOC_MAPK_MEF2A_6	35-42	KAVVDVDL	0.002584
									97-104	RSGVLVGM
AT3G24520	HSFC1	318	T	VESNPPTTPPYPFSL	57.702	14.896		MOD_ProDKin_1	220-226	SSSTPSP	0.01543
		225	S	VMSSSTPSPSSTENL	48.689	14.896			222-228	STPSPSS
		223	T	FRVMSSSTPSPSSTE	37.781	14.896			234-240	RNHSPDG
		269	S	MLSNSTSSTSSSLTS	17.258	14.896			315-321	PPTTPPY
		276	S	STSSSLTSTFSLPES	15.281	14.896
AT3G51060	STY1	328	T	VATASSSTPNLGGIG	38.174	14.896		MOD_ProDKin_1	325-331	SSSTPNL	0.01543
		353	T	DPAALYPTPINTFMA	35.946	14.896			350-356	LYPTPIN
AT3G54320	WRI1	56	S	DKSHNPTSPASTRRS	51.597	14.896		MOD_ProDKin_1	10-16	CSSSPSS	0.01543
		26	S	SSSTTTSSPIQSEAP	45.989	14.896			23-29	TTSSPIQ
		13	S	TTSTCSSSPSSSVSS	42.396	14.896			42-48	KKSSPSG
		343	S	CMMDTGFSPFLTDQN	38.761	14.896			53-59	NPTSPAS
		404	S	ESPPSSSSPLSCLST	34.288	14.896			340-346	TGFSPFL
		398	S	CCVVGRESPPSSSSP	32.173	14.896			395-401	GRESPPS
		45	S	AKRAKKSSPSGDKSH	25.914	14.896			401-407	SSSSPLS
		407	S	PSSSSPLSCLSTDSA	18.098	14.896		DOC_MAPK_FxFP_2	239-242	FPFP	5.626e-05
		419	T	DSASSTTTTTTSVSC	16.789	14.896
		416	S	LSTDSASSTTTTTTS	16.201	14.896
		410	S	SSPLSCLSTDSASST	15.949	14.896
		421	T	ASSTTTTTTSVSCNY	15.222	14.896
AT4G01680	MYB55	18	S	KLRKGLWSPEEDEKL	28.596	14.896		-	-	-	-		YGHGCWSSVPK	24	n. a.
		176	S	SSSTTTCSTNQNNNT	16.799	14.896
AT4G14465	AHL20	166	S	GAFLPGPSPPGSTGL	36.681	14.896		MOD_ProDKin_1	87-93	TRDSPNA	0.01543		LPMEEEEDGGGSR	28	Zhang et al., 2013
		90	S	PIFVTRDSPNALRSH	32.417	14.896			231-237	GGDSPPR			QIHGGGDSPPR	21	Zhang et al., 2013
		234	S	QIHGGGDSPPRIGSN	27.187	14.896		DOC_MAPK_gen_1	77-86	KNKPKAPIFV	0.004324
		170	S	PGPSPPGSTGLTVYL	21.144	14.896			79-86	KPKAPIFV
								DOC_MAPK_MEF2A_6	36-43	KGDLGIAM	0.002584
AT4G31610	REM1	417	T	QPRNVKKTPRLGVEG	30.769	14.896		MOD_ProDKin_1	278-284	EKKTPSP	0.01543
		90	S	VFHVAVVSPSVSGDI	29.141	14.896			414-420	VKKTPRL
		283	S	GKEKKTPSPFLIVKY	27.216	14.896		DOC_MAPK_gen_1	412-422	RNVKKTPRLGV	0.004324
		291	T	PFLIVKYTPSRETTG	26.242	14.896			415-422	KKTPRLGV
		281	T	SKGKEKKTPSPFLIV	18.545	14.896		DOC_MAPK_MEF2A_6	415-422	KKTPRLGV	0.002584
AT4G31800	WRKY18	89	S	EKLQSRQSPEIEQTD	35.558	14.896		DOC_MAPK_gen_1	21-29	KLPKKEVSV	0.004324		QSPEIEQTDIPIK	41	Umezawa et al., 2013
		194	S	KVTRDNPSPRAYFRC	18.715	14.896			156-164	KAKVSTVYV			QSPEIEQTDIPIK	34	Nakagami et al., 2010
													QSPEIEQTDIPIK	32	Sugiyama et al., 2008
													QSPEIEQTDIPIK	26	Umezawa et al., 2013
AT4G31920	RR10	356	S	SFTSQQNSPMVAPSN	43.114	14.896		MOD_ProDKin_1	353-359	QQNSPMV	0.01543
		426	S	NAFCDSASPLVNPNL	33.181	14.896			380-386	PGFSPHF
		383	S	LPSNPGFSPHFEISK	27.588	14.896			423-429	DSASPLV
		401	S	HWSNAALSTNIPQSD	15.62	14.896		DOC_MAPK_FxFP_2	456-459	FFYP	5.626e-05
AT4G35390	AGF1	45	T	DEAKAETTPTGGATS	47.396	14.896		MOD_ProDKin_1	20-26	DSRTPPD	0.01543		NKPKPPTIITR	99	Engelsberger and Schulze, 2012
		219	T	LPIEEEETPPPRTTG	32.732	14.896			42-48	AETTPTG			AETTPTGGATSSATASGSSSGR	40	Zhang et al., 2013
		86	S	PTIITRDSPNVLRSH	30.003	14.896			83-89	TRDSPNV			AETTPTGGATSSATASGSSSGR	33	Zhang et al., 2013
		23	T	QRPEDSRTPPDQNNM	26.748	14.896			216-222	EEETPPP			AETTPTGGATSSATASGSSSGR	30	Zhang et al., 2013
													LPIEEEETPPPR	30	Zhang et al., 2013
													NKPKPPTIITR	26	Engelsberger and Schulze, 2012
													NKPKPPTIITR	24	Engelsberger and Schulze, 2012
AT4G35550	WOX13	120	T	IFDQGTGTPSKQKIK	37.073	14.896		MOD_ProDKin_1	221-227	CFQSPEI	0.01543
		224	S	PEDLCFQSPEISSDL	35.563	14.896		DOC_MAPK_gen_1	184-195	KRVVRPESLLGL	0.004324
		103	T	ARQRWTPTPVQLQIL	33.499	14.896			185-195	RVVRPESLLGL
		101	T	MTARQRWTPTPVQLQ	19.293	14.896
		211	T	GLGTTTATTTAPRPE	17.623	14.896
		207	T	SNNNGLGTTTATTTA	15.307	14.896
AT4G35610	Putative C2H2-zinc-finger-type	259	S	AKFDLNKSPPKDEEE	31.176	14.896		MOD_ProDKin_1	256-262	LNKSPPK	0.01543		SSGDFSGSGGGDAPGSEGGR	95.38	Mayank et al., 2012
								DOC_MAPK_MEF2A_6	228-236	RGSGIDLNV	0.002584		ISTQTDDEGDGLGEGEAK	94.6	Mayank et al., 2012
													IFGESSSVVEEDAEK	43.07	Mayank et al., 2012
AT5G03510	Putative C2H2-zinc-finger-type	30	S	TKRQRSASPLMMNAA	31.929	14.896		MOD_ProDKin_1	27-33	RSASPLM	0.01543
								DOC_MAPK_gen_1	104-112	KKPVASLGL	0.004324
									244-253	RPKNFLQLDL
								DOC_MAPK_MEF2A_6	105-114	KPVASLGLGL	0.002584
									244-253	RPKNFLQLDL
									246-255	KNFLQLDLNL
AT5G03790	HB51	44	T	PYAGNSYTPGDTQTG	32.317	14.896		MOD_ProDKin_1	41-47	NSYTPGD	0.01543
AT5G04340	ZAT6	8	S	MALETLTSPRLSSPM	44.258	14.896		MOD_ProDKin_1	5-11	TLTSPRL	0.01543
		77	S	DLPSSSSSPPLLPPL	42.094	14.896			10-16	RLSSPMP
		223	S	NGDEEVMSPMPAKKL	32.36	14.896			74-80	SSSSPPL
		13	S	LTSPRLSSPMPTLFQ	32.35	14.896			220-226	EVMSPMP
		86	T	PLLPPLPTPIYKCSV	27.564	14.896		DOC_MAPK_FxFP_2	232-235	FDFP	5.626e-05
AT5G12870	MYB46	138	S	LINNSSSSPNTASDS	40.61	14.896		MOD_ProDKin_1	135-141	SSSSPNT	0.01543
		77	S	DLKRGAFSPQEEDLI	32.074	14.896			196-202	DDFTPYV
		24	S	KMKKGLWSPEEDSKL	27.209	14.896		DOC_MAPK_gen_1	2-8	RKPEVAI	0.004324
		199	T	HPCNDDFTPYVDGIY	26.19	14.896
AT5G16560	KAN1	164	S	AYRSLQSSPRLKGVP	37.945	14.896		MOD_ProDKin_1	161-167	LQSSPRL	0.01543		AQSDDTSLHQETDISSTQPR	32.25	Roitinger et al., 2015
		246	T	LGGHERATPKSVLEL	27.127	14.896			188-194	DSSSPHH
		191	S	VGSSDSSSPHHHNHH	20.78	14.896
		16	T	EKTKTNTTTTLPDLS	16.816	14.896
AT5G17300	RVE1	4	S	****MASSPLTANVQ	43.12	14.896		MOD_ProDKin_1	1-7	MASSPLT	0.01543
		189	S	LSPVSSASPPAALTT	42.723	14.896			146-152	RSVSPSE
		157	S	PSERDTQSPTSVLST	39.727	14.896			154-160	DTQSPTS
		177	S	LCSLDSSSPNRSLSP	34	14.896			174-180	DSSSPNR
		183	S	SSPNRSLSPVSSASP	33.095	14.896			180-186	RSLSPVS
		258	S	TTSTYCKSPIQPLPR	28.859	14.896			186-192	SSASPPA
		149	S	DQTSRSVSPSERDTQ	27.834	14.896			255-261	YCKSPIQ
AT5G18830	SPL7	79	S	AESELDPSPEESGSG	42.743	14.896		MOD_ProDKin_1	4-10	LSQSPPP	0.01543
		70	T	PPLIPTQTPAESELD	42.586	14.896			56-62	PVLSPPL
		718	S	ERIQADCSPDSGGKE	38.96	14.896			67-73	PTQTPAE
		59	S	IHFPPVLSPPLPPLI	37.759	14.896			76-82	LDPSPEE
		7	S	*MSSLSQSPPPPEMD	36.475	14.896			301-307	FERSPSN
		431	S	RVDVKLESPKLQFVY	28.231	14.896			428-434	KLESPKL
		304	S	NDTKFERSPSNGDNK	26.19	14.896			667-673	KHQSPIE
		670	S	DIHRKHQSPIESKVN	22.477	14.896			715-721	ADCSPDS
								DOC_MAPK_gen_1	155-161	KRHRVCL	0.004324
									423-429	KRVDVKL
									461-468	KCRFLVSF
								DOC_MAPK_MEF2A_6	250-259	RAEEEPSLIF	0.002584
									401-408	RGSMTVYL
									428-436	KLESPKLQF
								DOC_MAPK_FxFP_2	436-439	FVYP	5.626e-05
AT5G22570	WRKY38	251	S	VIEEYLSSPSGSYPP	36.681	14.896		MOD_ProDKin_1	2-8	EMNSPHE	0.01543
		78	S	DLSSRDSSPPPQGSP	33.702	14.896			75-81	RDSSPPP
		5	S	***MEMNSPHEKAVQ	28.328	14.896			81-87	PQGSPSK
		84	S	SSPPPQGSPSKKRKI	24.404	14.896			101-107	RDDSPDP
		104	S	SENWRDDSPDPIYYD	15.986	14.896			248-254	YLSSPSG
AT5G25830	GATA12	184	S	QHLSPPTSPPLLMAP	62.17	14.896		MOD_ProDKin_1	91-97	ESLSPED	0.01543
		119	S	DPKSDTGSPENPNSS	50.195	14.896			116-122	DTGSPEN
		210	S	RRKKDVSSPESGGAE	36.496	14.896			124-130	NSSSPIF
		180	S	LSSQQHLSPPTSPPL	34.487	14.896			162-168	FYDSPFT
		94	S	NIVDESLSPEDVHKL	30.719	14.896			177-183	QHLSPPT
		165	S	LKETFYDSPFTGETI	28.68	14.896			181-187	PPTSPPL
		264	S	PEYRPAASPTFVLAK	28.607	14.896			207-213	DVSSPES
		229	T	LHCATDKTPQWRTGP	28.441	14.896
		127	S	PENPNSSSPIFTTDV	27.834	14.896
		40	T	VVADSTTTTTITDSS	18.211	14.896
		41	T	VADSTTTTTITDSSN	15.417	14.896
		38	T	NDVVADSTTTTTITD	14.992	14.896
AT5G28300	GT2L	388	S	DVVQNPTSPSQDSSS	59.019	14.896		MOD_ProDKin_1	13-19	FIASPPP	0.01543		DQDQGQVEEASMENQR	64.28	Roitinger et al., 2015
		419	T	SLLPQTLTPHNLLTI	45.97	14.896			139-145	FKRSPQE			FTDHDLDVVQNPTSPSQDSSSLALR	30	Zhang et al., 2013
		16	S	QIHRFIASPPPPPPL	29.788	14.896			385-391	NPTSPSQ			FTDHDLDVVQNPTSPSQDSSSLALR	s. n. a.	Choudhary et al., 2015
		566	T	PPTGTTATTATTATS	21.41	14.896			416-422	QTLTPHN			FTDHDLDVVQNPTSPSQDSSSLALR	s. n. a.	Wang et al., 2013a
		142	S	AEVGFKRSPQECKEK	19.157	14.896		DOC_MAPK_gen_1	132-139	RKLAEVGF	0.004324		FTDHDLDVVQNPTSPSQDSSSLALR	s. n. a.	Hoehenwarter et al., 2013
		563	T	YSQPPTGTTATTATT	17.512	14.896		DOC_MAPK_DCC_7	32-40	RSLPFPVSF	0.0004513		FTDHDLDVVQNPTSPSQDSSSLALR	s. n. a.	Wang et al., 2013a
		434	S	DKSLEPFSTKTLKPK	15.989	14.896							FTDHDLDVVQNPTSPSQDSSSLALR	s. n. a.	Wang et al., 2013a
													FTDHDLDVVQNPTSPSQDSSSLALR	s. n. a.	Wang et al., 2013a
													FTDHDLDVVQNPTSPSQDSSSLALR	s. n. a.	Xue et al., 2013
													FISKFTDHDLDVVQNPTSPSQDSSSLALR	s. n. a.	Hoehenwarter et al., 2013
AT5G42630	KAN4	198	S	DEGTDTNSPNSSSVQ	41.182	14.896		MOD_ProDKin_1	164-170	DKGSPGE	0.01543
		167	S	VKCTDKGSPGEGKVE	29.063	14.896			195-201	DTNSPNS
		132	T	LGGHERATPKSVLEL	27.127	14.896		DOC_MAPK_MEF2A_6	62-69	KPLLSLGF	0.002584
									242-251	KEDTNIHLNL
								DOC_MAPK_DCC_7	11-21	RASNSVPDLSL	0.0004513
AT5G46760	MYC3	278	S	PTNTGIESPARVNNG	33.448	14.896		MOD_ProDKin_1	275-281	GIESPAR	0.01543		SAANDSDHSDLEASVVK	114.71	Van Leene et al., 2019
													SAANDSDHSDLEASVVK	114.71	Van Leene et al., 2019
													SAANDSDHSDLEASVVK	56.82	Roitinger et al., 2015
													SAANDSDHSDLEASVVK	56	Nakagami et al., 2010
													SAANDSDHSDLEASVVK	46	Sugiyama et al., 2008
													SAANDSDHSDLEASVVK	46	Nakagami et al., 2010
													SAANDSDHSDLEASVVK	44	Umezawa et al., 2013
													SAANDSDHSDLEASVVK	42	Sugiyama et al., 2008
													SAANDSDHSDLEASVVK	39	Nakagami et al., 2010
													SAANDSDHSDLEASVVK	37	Nakagami et al., 2010
													LDGMSKEGNNGK	37	n. a.
													SDSHQISK	36.82	Roitinger et al., 2015
													LDGMSKEGNNGK	36	n. a.
													SNETLSFCGNESSK	34.16	Roitinger et al., 2015
													SAANDSDHSDLEASVVK	33	Umezawa et al., 2013
													SAANDSDHSDLEASVVK	32	Sugiyama et al., 2008
													SAANDSDHSDLEASVVK	32	Umezawa et al., 2013
													SAANDSDHSDLEASVVK	31.99	Roitinger et al., 2015
													SAANDSDHSDLEASVVK	30	Zhang et al., 2013
													SAANDSDHSDLEASVVK	30	Zhang et al., 2013
													SAANDSDHSDLEASVVK	29	Sugiyama et al., 2008
													LDGMSKEGNNGK	28	n. a.
													LDGMSKEGNNGK	27	n. a.
													SDSHQISK	26.15	Roitinger et al., 2015
													LDGMSKEGNNGK	25	n. a.
													SAANDSDHSDLEASVVK	25	Umezawa et al., 2013
													SAANDSDHSDLEASVVK	24	Sugiyama et al., 2008
													SAANDSDHSDLEASVVK	23	Umezawa et al., 2013
													GSNNDEGMLSFSTVVRSAANDSDHSDLEASVVK	19	n. a.
													LDGMSKEGNNGK	16	n. a.
													SAANDSDHSDLEASVVK	4.847	Wang et al., 2013b
													SAANDSDHSDLEASVVK	3.151	Wang et al., 2013b
													SNETLSFCGNESSK	0.79975	Wang et al., 2013b
													SAANDSDHSDLEASVVK	0.75427	Wang et al., 2013b
AT5G59780	MYB59	120	S	QEKKRPMSPTSSSSN	47.715	14.896		MOD_ProDKin_1	117-123	RPMSPTS	0.01543
		196	S	LNFPPLASPTWESSL	39.761	14.896			193-199	PLASPTW
		67	T	GLKRGKMTPQEERLV	30.182	14.896
		136	T	CSSSMTTTTSQDTGG	15.746	14.896
AT5G60120	TOE2	380	T	MAAAACDTPFNFLKR	27.881	14.896		MOD_ProDKin_1	377-383	ACDTPFN	0.01543
		404	S	ALPSAFFSPMERTPE	27.819	14.896			401-407	AFFSPME
		409	T	FFSPMERTPEKGLML	25.141	14.896			406-412	MERTPEK
								DOC_MAPK_gen_1	324-332	KQKDRALRL	0.004324
								DOC_MAPK_MEF2A_6	110-117	RSTVDISF	0.002584
									308-317	KLDLNLGISL
AT5G62020	HSFB2A	22	T	SSQRSIPTPFLTKTF	35.374	14.896		MOD_ProDKin_1	134-140	MVVSPSN	0.01543		TTAVVGENSDEETPWLR	35	Zhang et al., 2013
		137	S	RNQTMVVSPSNSGED	34.385	14.896			151-157	MSSSPSS			MNSPPVDAMITGESSSQR	s. n. a.	Lin et al., 2015
		3	S	*****MNSPPVDAMI	33.529	14.896			218-224	RSYSPGG
		250	S	IEEEEEASPRLFGVP	27.918	14.896			247-253	EEASPRL
		221	S	QPTDRSYSPGGSSSQ	26.612	14.896			281-287	DEETPWL
		284	T	GENSDEETPWLRHYN	24.165	14.896		DOC_MAPK_gen_1	236-243	KRFSEMEI	0.004324
		154	S	NNQVMSSSPSSWYCH	23.038	14.896			261-270	KRTRSEGVQV
									262-270	RTRSEGVQV
								DOC_MAPK_MEF2A_6	252-260	RLFGVPIGL	0.002584
AT5G65210	TGA1	68	T	TSHGTAGTPHMFDQE	34.42	14.896		MOD_ProDKin_1	38-44	TMNTPNH	0.01543
		41	T	ISNGTMNTPNHIIIP	28.552	14.896			65-71	TAGTPHM
								DOC_MAPK_MEF2A_6	236-245	RPSDLLKVLL	0.002584
AT5G65590	SCAP1	263	S	VNSSSPSSPTKKGDN	49.602	14.896		MOD_ProDKin_1	6-12	NLPSPKP	0.01543		NLEIVNSSSPSSPTK	59	Umezawa et al., 2013
		260	S	LEIVNSSSPSSPTKK	28.862	14.896			45-51	RCNSPNT			NLEIVNSSSPSSPTK	47	Umezawa et al., 2013
		191	S	GDFNNNHSPTGFTTA	27.433	14.896			167-173	RENTPVD			NLEIVNSSSPSSPTK	35	Umezawa et al., 2013
		170	T	MSSGRENTPVDVGSG	27.236	14.896			188-194	NNHSPTG			NLEIVNSSSPSSPTK	18.55	Roitinger et al., 2015
		9	S	SSHTNLPSPKPVPKP	24.612	14.896			257-263	NSSSPSS			SSHTNLPSPKPVPK	13.38	Roitinger et al., 2015
		48	S	LKCPRCNSPNTKFCY	19.586	14.896			260-266	SPSSPTK

## Sheet: References
Supplementary references
Bhaskara, G. B., Wen, T. N., Nguyen, T. T., and Verslues, P. E. (2017). Protein phosphatase 2Cs and Microtubule-Associated Stress Protein 1 control microtubule stability, plant growth, and drought response. Plant Cell 29, 169–191. doi: 10.1105/tpc.16.00847
Choudhary, M. K., Nomura, Y., Wang, L., Nakagami, H., and Somers, D. E. (2015). Quantitative circadian phosphoproteomic analysis of Arabidopsis reveals extensive clock control of key components in physiological, metabolic, and signaling pathways. Mol. Cell Proteomics 14, 2243–2260. doi: 10.1074/mcp.M114.047183
Engelsberger, W. R., and Schulze, W. X. (2012). Nitrate and ammonium lead to distinct global dynamic phosphorylation patterns when resupplied to nitrogen-starved Arabidopsis seedlings. Plant J. 69, 978–995. doi: 10.1111/j.1365-313X.2011.04848.x
Hoehenwarter, W., Thomas, M., Nukarinen, E., Egelhofer, V., Röhrig, H., Weckwerth, W., et al. (2013). Identification of novel in vivo MAP kinase substrates in Arabidopsis thaliana through use of tandem metal oxide affinity chromatography. Mol. Cell. Proteomics 12, 369–380. doi: 10.1074/mcp.M112.020560
Lin, L. L., Hsu, C. L., Hu, C. W., Ko, S. Y., Hsieh, H. L., Huang, H. C., et al. (2015). Integrating phosphoproteomics and bioinformatics to study brassinosteroid-regulated phosphorylation dynamics in Arabidopsis. BMC Genom. 16, 533. doi: 10.1186/s12864-015-1753-4
Mayank, P., Grossman, J., Wuest, S., Boisson-Dernier, A., Roschitzki, B., Nanni, P., et al. (2012). Characterization of the phosphoproteome of mature Arabidopsis pollen. Plant J. 72, 89–101. doi: 10.1111/j.1365-313X.2012.05061.x
Mithoe, S. C., Boersema, P. J., Berke, L., Snel, B., Heck, A. J., and Menke, F. L. (2012). Targeted quantitative phosphoproteomics approach for the detection of phospho-tyrosine signaling in plants. J. Proteome Res. 11, 438–448. doi: 10.1021/pr200893k
Nakagami, H., Sugiyama, N., Mochida, K., Daudi, A., Yoshida, Y., Toyoda, T., et al. (2010). Large-scale comparative phosphoproteomics identifies conserved phosphorylation sites in plants. J. Plant Physiol. 153, 1161–1174. doi: 10.1104/pp.110.157347
Roitinger, E., Hofer, M., Köcher, T., Pichler, P., Novatchkova, M., Yang, J., et al. (2015). Quantitative phosphoproteomics of the ataxia telangiectasia-mutated (ATM) and ataxia telangiectasia-mutated and rad3-related (ATR) dependent DNA damage response in Arabidopsis thaliana. Mol. Cell Proteomics 14, 556–571. doi: 10.1074/mcp.M114.040352
Sugiyama, N., Nakagami, H., Mochida, K., Daudi, A., Tomita, M., Shirasu, K., et al. (2008). Large-scale phosphorylation mapping reveals the extent of tyrosine phosphorylation in Arabidopsis. Mol. Syst. Biol. 4, 193. doi: 10.1038/msb.2008.32
Umezawa, T., Sugiyama, N., Takahashi, F., Anderson, J. C., Ishihama, Y., Peck, S. C., et al. (2013). Genetics and phosphoproteomics reveal a protein phosphorylation network in the abscisic acid signaling pathway in Arabidopsis thaliana. Sci. Signal. 6:rs8. doi: 10.1126/scisignal.2003509
Van Leene, J., Han, C., Gadeyne, A., Eeckhout, D., Matthijs, C., Cannoot, B., et al. (2019). Capturing the phosphorylation and protein interaction landscape of the plant TOR kinase. Nat. Plants 5, 316–327. doi: 10.1038/s41477-019-0378-z
Wang, X., Bian, Y., Cheng, K., Gu, L. F., Ye, M., Zou, H., et al. (2013a). A large-scale protein phosphorylation analysis reveals novel phosphorylation motifs and phosphoregulatory networks in Arabidopsis. J. Proteom. 78, 486–498. doi: 10.1016/j.jprot.2012.10.018
Wang, P., Xue, L., Batelli, G., Lee, S., Hou, Y. J., Van Oosten, M. J., et al. (2013b). Quantitative phosphoproteomics identifies SnRK2 protein kinase substrates and reveals the effectors of abscisic acid action. Proc. Natl. Acad. Sci. U.S.A. 110, 11205–11210. https://doi.org/10.1073/pnas.1308974110
Xue, L., Wang, P., Wang, L., Renzi, E., Radivojac, P., Tang, H., et al. (2013). Quantitative measurement of phosphoproteome response to osmotic stress in Arabidopsis based on Library-Assisted eXtracted Ion Chromatogram (LAXIC). Mol. Cell. Proteomics 12, 2354–2369. doi: 10.1074/mcp.O113.027284
Zhang, H., Zhou, H., Berke, L., Heck, A. J., Mohammed, S., Scheres, B., et al. (2013). Quantitative phosphoproteomics after auxin-stimulated lateral root induction identifies an SNX1 protein phosphorylation site required for growth. Mol. Cell. Proteomics 12, 1158–1169. doi: 10.1074/mcp.M112.021220
